# Supplementary material for: First COVID-19 wave in the province of Bergamo, Italy: epidemiological and clinical characteristics, outcome and management of the first hospitalized patients
Source: Springer Nature journal article supplement (doi:10.1186/s12879-024-09034-4), 2024-01-31
Supplement: MOESM1 [file 26682076]

## Supplementary Material – Tables

| Covariate                            | Data Availability (%) | Covariate Level | aHR   | 95% CI |       | p-value   |
|--------------------------------------|-----------------------|-----------------|-------|--------|-------|-----------|
| Sex                                  | 100                   | Female          | 0.82  | 0.64   | 1.05  | p=0.119   |
| Class of age (years)                 | 100                   | <50             | 0.00  | 0.00   |       | p=1.000   |
|                                      |                       | 50-59           | 0.20  | 0.10   | 0.38  | p<0.001*  |
|                                      |                       | 60-69           | 0.71  | 0.52   | 0.98  | p=0.038*  |
|                                      |                       | 80+             | 1.18  | 0.90   | 1.55  | p=0.234   |
| Comorbidities (N)                    | 100                   | One             | 1.02  | 0.69   | 1.49  | p=0.936   |
|                                      |                       | Two             | 1.13  | 0.77   | 1.66  | p=0.547   |
|                                      |                       | Three+          | 1.63  | 1.07   | 2.47  | p=0.022*  |
| Hypertension                         |                       |                 | 1.04  | 0.81   | 1.35  | p=0.747   |
| Diabetis                             |                       |                 | 1.25  | 0.98   | 1.61  | p=0.078   |
| Obesity                              |                       |                 | 1.42  | 1.02   | 1.98  | p=0.036*  |
| Cardiovascular disease               |                       |                 | 1.06  | 0.81   | 1.39  | p=0.681   |
| Kidney failure                       |                       |                 | 1.38  | 0.86   | 2.23  | p=0.185   |
| Active tumour                        |                       |                 | 1.16  | 0.82   | 1.63  | p=0.403   |
| Oxygen Saturation level              | 90                    | 95-90%          | 1.31  | 0.76   | 2.25  | p=0.339   |
|                                      |                       | <90%            | 3.25  | 2.00   | 5.27  | p<0.001*  |
| Respiratory support                  | 100                   | Oxygen          | 1.69  | 1.08   | 2.66  | p=0.023*  |
|                                      |                       | C-PAP           | 5.45  | 3.44   | 8.64  | p<0.001*  |
|                                      |                       | MV              | 2.71  | 1.47   | 5.02  | p=0.001*  |
| ICU stay                             | 100                   |                 | 0.73  | 0.46   | 1.16  | p=0.181   |
| Antibiotics                          | 100                   |                 | 0.78  | 0.59   | 1.03  | p=0.079   |
| Azithromycin                         | 100                   |                 | 0.58  | 0.46   | 0.73  | p<0.001*  |
| Standard antivirals                  | 100                   |                 | 1.22  | 0.92   | 1.62  | p=0.160   |
| HIV antivirals                       | 100                   |                 | 1.03  | 0.81   | 1.31  | p=0.815   |
| Antirheumatics                       | 100                   |                 | 0.38  | 0.29   | 0.48  | p=0.001*  |
| Corticosteroids                      | 100                   |                 | 0.68  | 0.53   | 0.87  | p=0.002*  |
| Anticoagulants                       | 100                   |                 | 0.55  | 0.39   | 0.78  | p=0.001*  |
| Opioids                              | 100                   |                 | 4.58  | 3.54   | 5.91  | p=0.001*  |
| Tocilizumab (RoActemra®)             | 100                   |                 | 0.51  | 0.28   | 0.91  | p=0.022*  |
| Deoxyhemoglobin, %                   | 58                    | <1.4            | 0.988 | 0.381  | 2.567 | p=0.981   |
|                                      |                       | >4.9            | 2.152 | 1.437  | 3.223 | p=<0.001* |
| Platelet count, 10 <sup>3</sup> /μl  | 96                    | <150            | 1.282 | 0.978  | 1.681 | p=0.072   |
|                                      |                       | >400            | 0.442 | 0.226  | 0.866 | p=0.017*  |
|                                      |                       | >170            | 1.240 | 0.964  | 1.595 | p=0.094   |
| Prothrombin time, seconds            | 91                    | >170            | 1.240 | 0.964  | 1.595 | p=0.094   |
| Partial thromboplastin time, seconds | 89                    | <24             | 0.915 | 0.226  | 3.702 | p=0.901   |
|                                      |                       | >38             | 1.236 | 0.925  | 1.650 | p=0.152   |
| D-dimer, U/L                         | 63                    | >500            | 2.439 | 0.900  | 6.612 | p=0.08    |
| Neutrophils/ lymphocytes ratio       | 95                    | >9.8            | 1.407 | 1.094  | 1.809 | p=0.008*  |
| Lactate dehydrogenase, U/L           | 23                    | >250            | 2.686 | 0.975  | 7.394 | p=0.056   |
| Aspartate transaminase, U/L          | 77                    | >47             | 2.145 | 1.585  | 2.904 | p=<0.001* |
| Alanine aminotransferase, U/L        | 96                    | >47             | 1.288 | 0.991  | 1.674 | p=0.059   |
| Creatine kinase, U/L                 | 65                    | <27             | 0.837 | 0.263  | 2.659 | p=0.762   |
|                                      |                       | >170            | 2.278 | 1.675  | 3.099 | p=<0.001* |
| Cardiac troponin type I, μg/L        | 46                    | >0.014          | 3.300 | 1.771  | 6.148 | p=<0.001* |

**Table S1.** Single Cox PH regression models controlling for sex and age. Example: 1<sup>st</sup> line: result for gender is controlled for age, 3<sup>rd</sup> line: results for comorbidities are adjusted for sex and age. Legend: aHR is for adjusted Hazard Ratio (95% CI). The reference covariates' level are: male, 70-79 class of age, absence of comorbidities, >95% oxygen saturation level recorded by first operators before any supporting oxygen flow administration, no therapy administration and biomarker's in-range value for laboratory tests performed at the day of hospital admission, in details: deoxyhemoglobin: 1.4-4.9%, platelet count:150-400 10<sup>3</sup>/μl, PT:9.5-13.8 seconds, PTT: 24-38 seconds, D-dimer:<500 U/L, neutrophils lymphocytes ratio:<9.8 [21], lactate dehydrogenase:135-250 U/L, AST and ALT:<47 U/L, creatine kinase:27-170 U/L, cardiac troponin Hs-Tn-I: <0.014 μg/L; "pts" is for patients and star's symbol is for statistically significant at p<0.05.

| Parameter                | Group  | Patients (N) | Events (N) | Events (%) | mOS (days) | 95% CI |    | Log Rank Test |
|--------------------------|--------|--------------|------------|------------|------------|--------|----|---------------|
| Gender                   | Male   | 474          | 186        | 39.2       | 30         | 23     | 43 | p=0.784       |
|                          | Female | 249          | 95         | 38.2       | 37         | 28     | nd |               |
| Class of age (years)     | <50    | 38           | 0          | 0.0        | nr         | nd     | nd | p<0.0001*     |
|                          | 50-59  | 100          | 10         | 10.0       | nr         | nd     | nd |               |
|                          | 60-69  | 163          | 56         | 34.4       | nr         | 23     | nd |               |
|                          | 70-79  | 235          | 114        | 48.5       | 23         | 16     | 34 |               |
|                          | 80+    | 187          | 101        | 54.0       | 17         | 10     | 32 |               |
| Comorbidities (N)        | None   | 160          | 39         | 24.4       | 50         | 27     | nd | p<0.0001*     |
|                          | One    | 253          | 96         | 37.9       | 36         | 23     | nd |               |
|                          | Two    | 211          | 87         | 41.2       | 32         | 20     | nd |               |
|                          | Three+ | 99           | 59         | 59.6       | 11         | 8      | 23 |               |
| Hypertension             | No     | 273          | 87         | 31.9       | 37         | 30     | nd | p=0.025*      |
|                          | Yes    | 450          | 194        | 43.1       | 30         | 19     | 51 |               |
| Diabetis                 | No     | 532          | 190        | 35.7       | 37         | 30     | nd | p=0.008*      |
|                          | Yes    | 191          | 91         | 47.6       | 23         | 14     | 38 |               |
| Obesity                  | No     | 627          | 238        | 38.0       | 36         | 26     | 50 | p=0.080       |
|                          | Yes    | 96           | 43         | 44.8       | 30         | 14     | 53 |               |
| Cardiovascular disease   | No     | 584          | 208        | 35.6       | 50         | 31     | nd | p=0.009*      |
|                          | Yes    | 139          | 73         | 52.5       | 21         | 13     | 30 |               |
| Kidney failure           | No     | 690          | 263        | 38.1       | 36         | 27     | 50 | p=0.181*      |
|                          | Yes    | 33           | 18         | 54.5       | 20         | 7      | nd |               |
| Active tumour            | No     | 643          | 243        | 37.8       | 36         | 27     | 50 | p=0.142*      |
|                          | Yes    | 80           | 38         | 47.5       | 23         | 8      | nd |               |
| Oxygen Saturation level  | >95%   | 102          | 18         | 17.7       | 51         | 28     | nd | p<0.0001*     |
|                          | 95-90% | 192          | 46         | 24.0       | 36         | 31     | nd |               |
|                          | <90%   | 352          | 190        | 54.0       | 14         | 10     | 23 |               |
| Respiratory support      | None   | 139          | 22         | 15.8       | nr         | 32     | nd | p<0.0001*     |
|                          | Oxygen | 392          | 130        | 33.2       | 50         | 36     | nd |               |
|                          | C-PAP  | 140          | 107        | 76.4       | 6          | 6      | 8  |               |
|                          | MV     | 52           | 22         | 42.3       | 51         | 17     | nd |               |
| ICU stay                 | No     | 649          | 259        | 39.9       | 31         | 23     | 43 | p=0.006*      |
|                          | Yes    | 74           | 22         | 29.7       | 52         | 30     | nd |               |
| Antibiotics              | No     | 159          | 65         | 40.9       | 28         | 17     | nd | p=0.170       |
|                          | Yes    | 564          | 216        | 38.3       | 36         | 26     | 50 |               |
| Azithromycin             | No     | 271          | 131        | 48.3       | 17         | 12     | 28 | p<0.0001*     |
|                          | Yes    | 452          | 150        | 33.2       | 43         | 34     | nd |               |
| Standard antivirals      | No     | 573          | 217        | 37.9       | 36         | 26     | 50 | p=0.363       |
|                          | Yes    | 150          | 64         | 42.7       | 30         | 16     | nd |               |
| HIV antivirals           | No     | 376          | 145        | 38.6       | 37         | 26     | 51 | p=0.056#      |
|                          | Yes    | 347          | 136        | 39.2       | 30         | 23     | nd |               |
| Antirheumatics           | No     | 175          | 101        | 57.7       | 8          | 6      | 11 | p<0.0001*     |
|                          | Yes    | 548          | 180        | 32.8       | 43         | 34     | nd |               |
| Corticosteroids          | No     | 438          | 170        | 38.8       | 30         | 21     | 50 | p=0.003*      |
|                          | Yes    | 285          | 111        | 38.9       | 43         | 30     | nd |               |
| Anticoagulants           | No     | 91           | 37         | 40.7       | 23         | 9      | nd | p=0.006*      |
|                          | Yes    | 632          | 244        | 38.6       | 36         | 28     | 50 |               |
| Opioids                  | No     | 479          | 86         | 18.0       | nr         | 51     | nd | p<0.0001*     |
|                          | Yes    | 244          | 195        | 79.9       | 9          | 7      | 10 |               |
| Tocilizumab (RoActemra®) | No     | 674          | 269        | 39.9       | 30         | 23     | 50 | p=0,003*      |
|                          | Yes    | 49           | 12         | 24.5       | 43         | 38     | nd |               |

**Table S2.** Survival analysis. Patients (as N) and events (as N and %) within groups are reported. Median survival time in days estimates by Kaplan-Meier curves (mOS, IC95%) and differences between groups obtained by Log Rank test are reported as well. Legend: star is for “statistically significant at p-value<0.05”. Significant associations are confirmed controlling for sex, age, oxygen saturation level and comorbidities as well.

| Laboratory test                      | AUC    | 95% CI        | Threshold | Specificity (%) | Sensitivity (%) |
|--------------------------------------|--------|---------------|-----------|-----------------|-----------------|
| Cardiac troponin type I, µg/L        | 0.7867 | 0.7383-0.8351 | 0.03      | 75.7%           | 70.2%           |
| FIB-4 index                          | 0.7381 | 0.6952-0.7810 | 3.63      | 76.8%           | 60.0%           |
| Lactate dehydrogenase, U/L           | 0.7102 | 0.6306-0.7898 | 458.65    | 83.3%           | 51.5%           |
| APRI index                           | 0.6876 | 0.6416-0.7335 | 0.48      | 56.9%           | 71.5%           |
| AST/ ALT ratio                       | 0.6813 | 0.6335-0.7291 | 1.80      | 83.9%           | 47.0%           |
| Deoxyhemoglobin, %                   | 0.6729 | 0.6203-0.7254 | 7.25      | 61.5%           | 70.1%           |
| Aspartate transaminase, U/L          | 0.6726 | 0.6261-0.7191 | 57.25     | 70.3%           | 57.5%           |
| D-dimer, U/L                         | 0.6656 | 0.6093-0.7218 | 1384.0    | 58.7%           | 70.4%           |
| Creatine kinase, U/L                 | 0.6609 | 0.6087-0.7131 | 167.25    | 72.1%           | 56.3%           |
| Neutrophil proportion on WBC, %      | 0.6508 | 0.6097-0.6920 | 79.15     | 58.4%           | 68.4%           |
| Neutrophils/ lymphocytes ratio       | 0.6503 | 0.6092-0.6914 | 5.38      | 52.5%           | 75.1%           |
| Lymphocyte proportion on WBC, %      | 0.6441 | 0.6028-0.6854 | 14.45     | 52.3%           | 74.7%           |
| Prothrombin time, seconds            | 0.5974 | 0.5524-0.6424 | 14.45     | 69.8%           | 46.9%           |
| Platelet count, 10 <sup>3</sup> /µl  | 0.5932 | 0.5502-0.6363 | 206.0     | 55.7%           | 59.9%           |
| Monocyte proportion on WBC, %        | 0.5796 | 0.5359-0.6233 | 6.25      | 57.7%           | 57.6%           |
| Partial thromboplastin time, seconds | 0.5717 | 0.5262-0.6171 | 32.35     | 44.9%           | 68.2%           |
| Alanine aminotransferase, U/L        | 0.5217 | 0.4772-0.5662 | 23.70     | 32.2%           | 74.4%           |
| Basophil proportion on WBC, %        | 0.4390 | 0.3963-0.4816 | 1.35      | 99.3%           | 0.7%            |
| Eosinophil proportion on WBC, %      | 0.3952 | 0.3581-0.4323 | nd        |                 |                 |

**Table S3.** Receiver operating characteristics by outcome. Results for laboratory tests performed at the day of hospital admission are listed in decreasing order according to the value of the related Area Under the Curve (AUC, 95% CI). Suggested biomarker's threshold, specificity and sensitivity percentages are reported as well.

## Supplementary Material – Figures

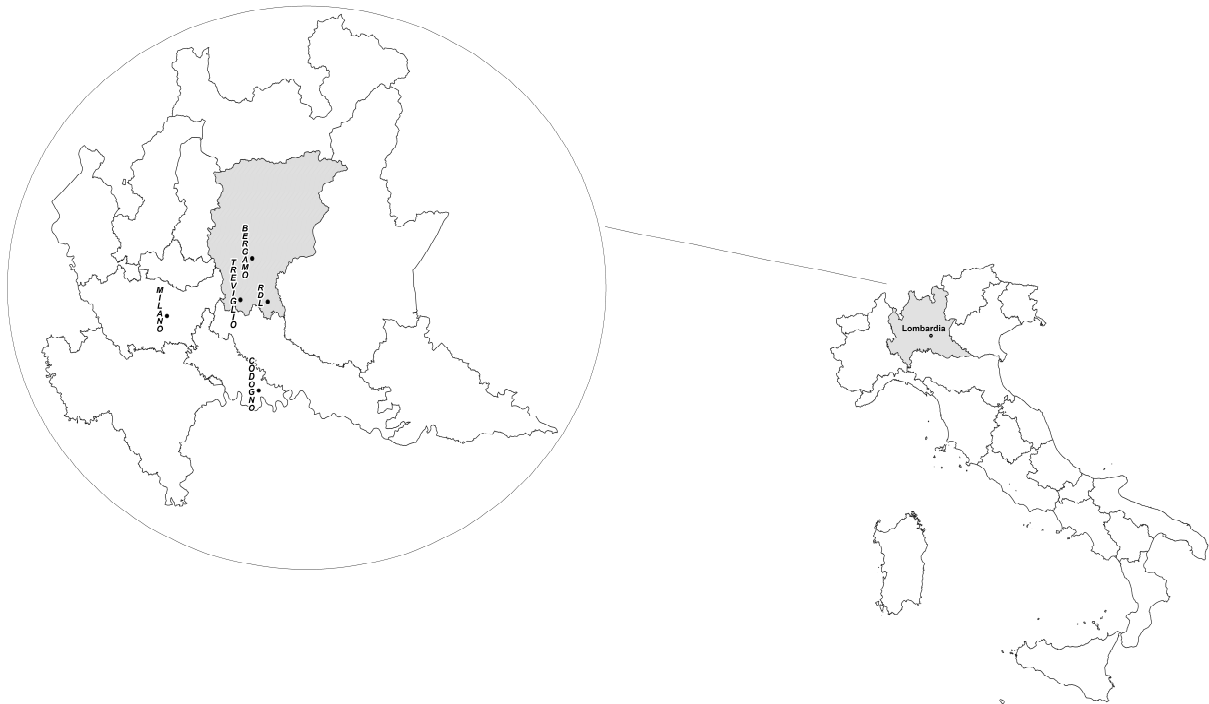

**Figure S1.** Graphical maps obtained using vector layers in the geographic information system Q-GIS software (Version 3.16). The region of Lombardia, the light grey area in the map of Italy on the right and zoomed in the circle on the left, is one of the twenty administrative regions of Italy. It expands all the way up for 9,206 square miles in the northern-central part of the country. It has a population of about 10 million people, corresponding more than one-sixth of all country population, and its capital is the city of Milano. Codogno is a small city in the province of Lodi in south of the Lombardia's region, and it is far about 40 miles from the city of Bergamo. Bergamo's city is the mayor city of the province of Bergamo, the European epicenter of the pandemic: the area filled in grey in zoomed map of Lombardia on the left. The two cities where the two hospitals that constitute the "ASST Bergamo Ovest" health facility are located are Treviglio and Romano di Lombardia. These cities are both belonging to the province of Bergamo, and they are respectively 16 and 15 miles from the city of Bergamo and 25 and 28 miles from Codogno. Legend: "RDL" is for Romano di Lombardia.

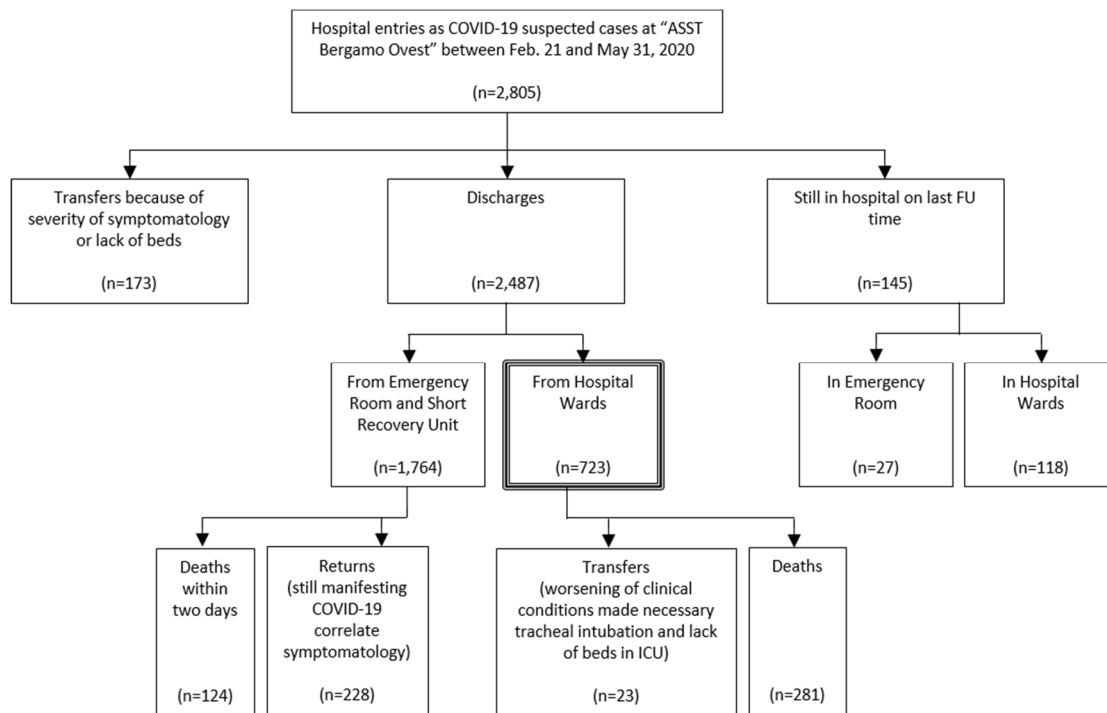

**Figure S2.** Cohort flow chart. This report focus on patients who were admitted to the “ASST Bergamo Ovest” hospital wards between February 21 and May 31, 2020, because of symptomatology COVID-19 correlate, who had a laboratory confirmed SARS-CoV-2 infection and were discharged within the end of the follow up, on late night of May 31, 2020, for a total of 723 patients. In the chart, the Study’s cohort corresponds to the double line box.

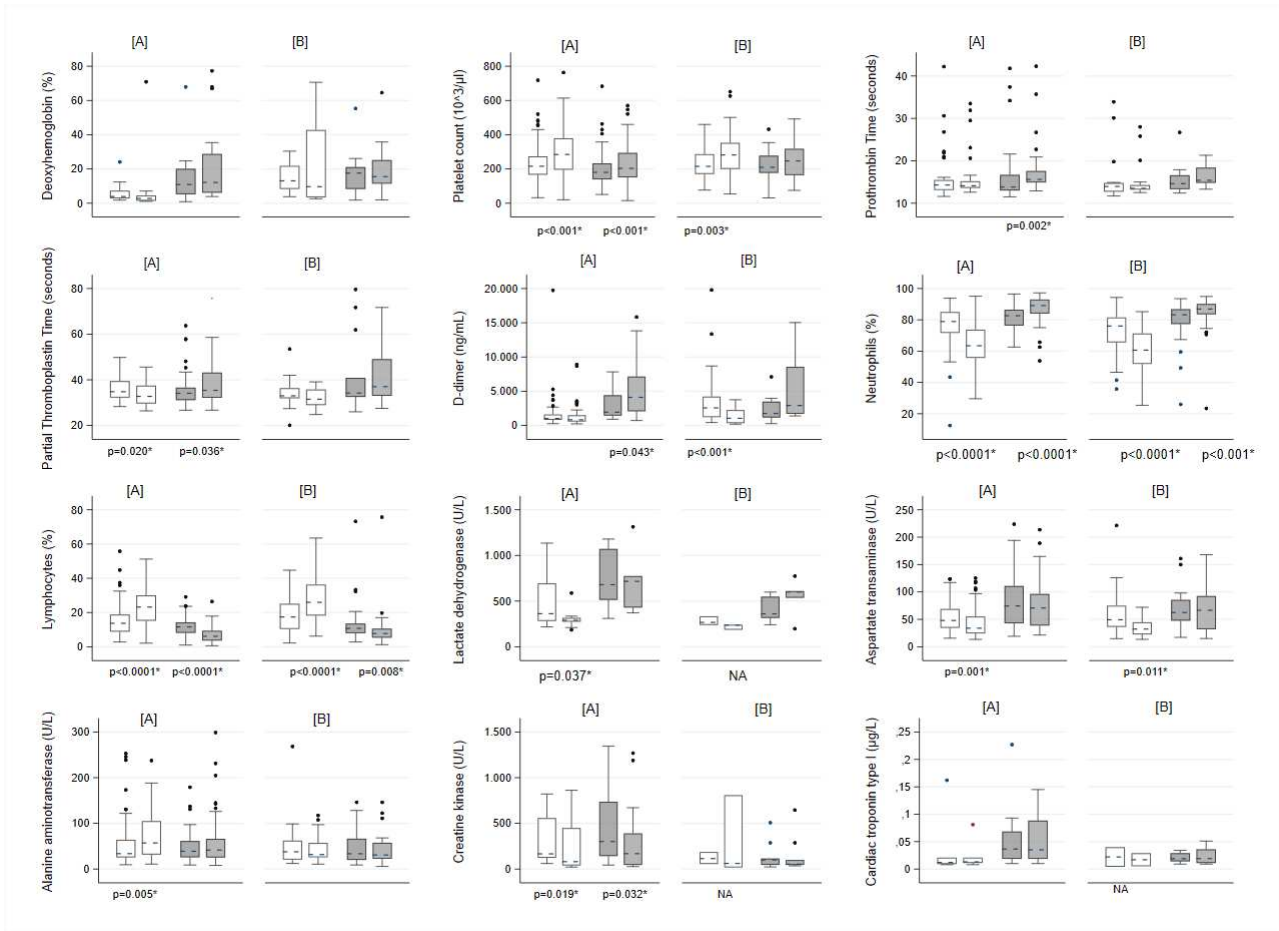

**Figure S3.** Laboratory biomarkers' changes over time. In these boxplots are illustrated only patients whom data are available both at hospital admission and at discharge. Single graph legend: male patients on the left (the first four bars [A]), female on the right (second group of four bars, [B]). Within four-bars group: discharge live patients are white color couple of bars, grey color couple of bars is for died patients. Within couple of bars: first bar represents biomarker's values at hospital admission, second bar represents biomarker's values at hospital discharge. Example: First graph: first four-bars group, panel [A]: 1<sup>st</sup> bar: deoxyhemoglobin value at admission for discharged alive male patients, 2<sup>nd</sup> bar: deoxyhemoglobin value at discharge for discharged alive male patients, 3<sup>rd</sup> bar: deoxyhemoglobin value at admission for died male patients, 4<sup>th</sup> bar: deoxyhemoglobin value at discharge for died male patients. Second four-bars group, panel [B]: same as male is for female. Statistically significance is only reported if  $p < 0.05$ , NA is for not applicable test because the low number of available data.

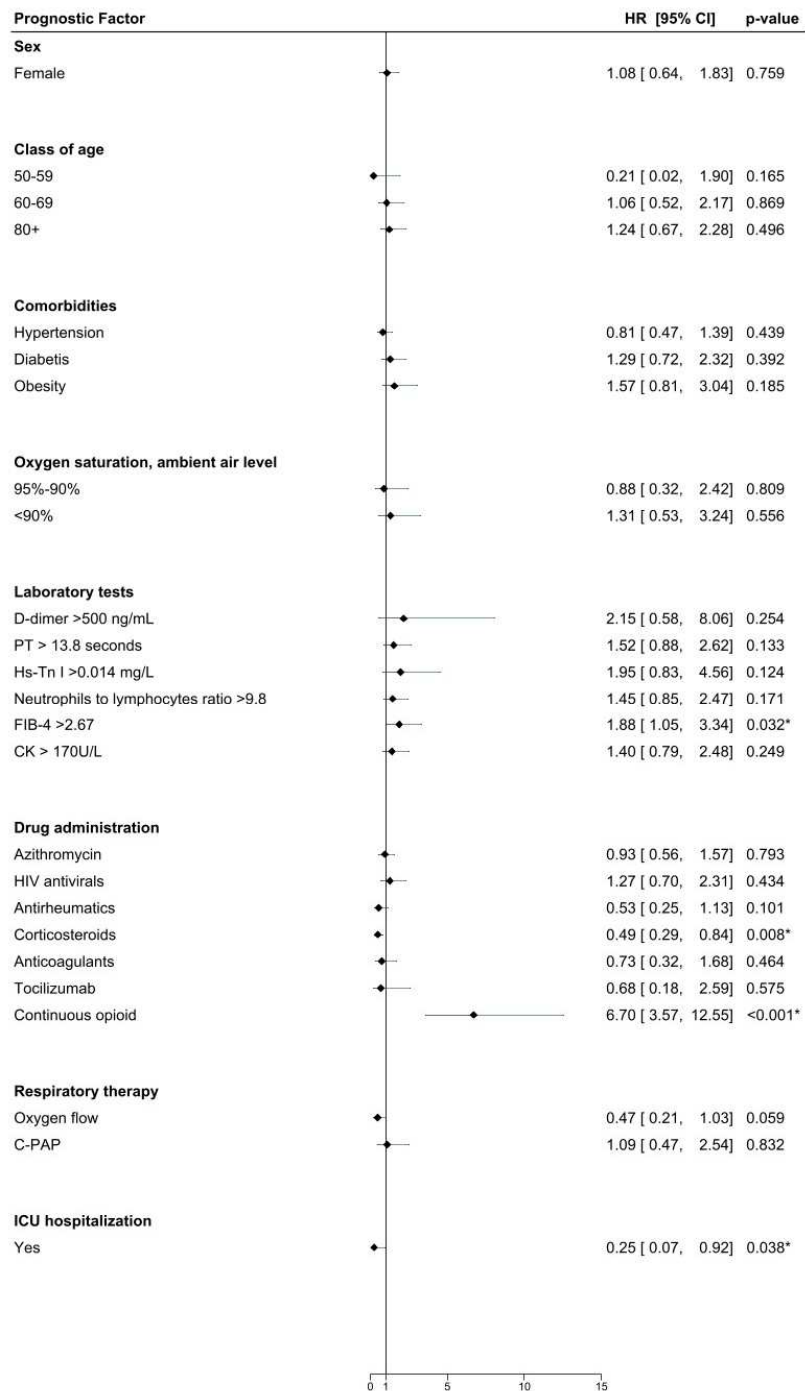

**Figure S4.** Multivariable Cox PH regression model illustrated by a Forest Plot. Male sex, 70-79 class of age and >95% oxygen saturation level are the reference covariates. Legend: HR is for Hazard Ratio [95% confidence interval]; star symbol is for statistically significant at 0.05 level.
